# Supplementary material for: Mitochondrial Aurora kinase A induces mitophagy by interacting with MAP1LC3 and Prohibitin 2
Source: Life Sci Alliance. 2021 Apr 5;4(6):e202000806. doi: 10.26508/lsa.202000806 (PMC8046421; doi:10.26508/lsa.202000806)
Supplement: Supplementary file 8 [file LSA-2020-00806_TableS3.xlsx]

## Sheet: Feuil 1
Table S3. List of primary antibodies used for Wwestern blotting procedures. The table contains the name of the antibody used, the supplier, the catalogue number and the final dilution used.
Antibody	Brand	Catalogue n°	Dilution
Actin	Sigma-Aldrich	A5060	1/1000
AURKA clone 5C3	home made	N.A. (as in Bertolin et al, 2018)	1/20
GFP	Roche/ Sigma Aldrich	11814460001	1/1000
LC3	Novus Biologicals	NB100-2331	1/1000
MitoFusin2	Abcam	ab56889	1/500
MT-CO1	Abcam	ab203912	1/1000
MT-CO2	home made	N.A. (From Agier et al, 2012)	1/2000
PARKIN clone PARK8	Millipore	MAB5512	1/1000
PGC1a	Abcam	ab188102	1/1000
PHB	Thermo Scientific	PA5-19556	1/500
PHB2/REA	Thermo Scientific	PA5-79817	1/1000
SDHA	Abcam	ab137040	1/2000
Tim50	Abcam	ab109436	1/2000
Tom22	Abcam	ab10436	1/500
Tubulin alpha clone YL1/2	Millipore	MAB1864	1/5000
